# Supplementary material for: Owners’ perception of acquiring infections through raw pet food: a comprehensive internet-based survey
Source: PubMed Central journal article supplement — Vet Rec. 2019 Aug 19;185(21):658. doi: 10.1136/vr.105122 (PMC6952838; doi:10.1136/vr.105122), 2019-08-19
Supplement: vetrec-2018-105122supp001.pdf [file vetrec-2018-105122supp001.pdf]

1  
2  
3 **S1.** The questionnaire to raw feeding dog and cat owners (in English).  
4  
5

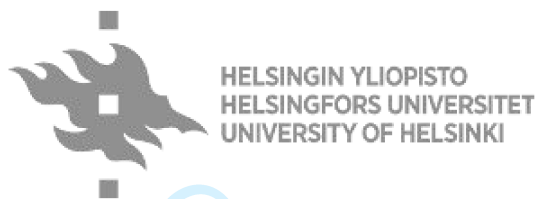

## 13 **Questionnaire about raw feeding and** 14 **pathogens** 15 16 17

18  
19 Dear dog and/or cat owner! If you are feeding your animal a raw diet either partly or completely or  
20 have been feeding such a diet at some point of any of your pets' life, we would like you to complete  
21 this questionnaire. The objective is to find out if there has been any PEOPLE getting sick from a  
22 contaminated raw pet food. We need both, people who have become sick and who have not become  
23 sick, to complete this questionnaire. Only then we can evaluate the incidence of humans getting sick  
24 due to raw feeding. There has been a lot of talk about the risks of raw pet foods transmitting  
25 diseases to the people living in the same household, and we are keen to find the true incidence  
26 worldwide. Thank you for your time!  
27  
28

29 By completing this questionnaire, you give us your permission to use the data for publishing a  
30 research article in a scientific journal.  
31

32 Best regards,  
33

34 the DOGRISK research group, University of Helsinki, Finland. [www.dogrisk.com](http://www.dogrisk.com)  
35

36 Group leader: Anna Hielm-Björkman  
37

38 We can be contacted at [hydogrisk@gmail.com](mailto:hydogrisk@gmail.com).  
39  
40

41  
42 Raw feeding here means using any raw animal derived products, such as meat, organs, bones,  
43 cartilage etc. fed to your pet UNCOOKED.  
44  
45

### 46 **Basic** 47

48 **Female Male**

49 **Your gender**    
50

51 Your age in years   
52

53 What country are you living in?   
54  
55  
56  
57  
58  
59  
60

<https://mc.manuscriptcentral.com/vetrec>

1  
2  
3  
4  
5  
6  
7  
8  
9

**Dog(s)   Cat(s)   Both dog(s) and cat(s)**

**The animal that is / has been fed raw diet is a**        

**Never   Sometimes   Almost daily / daily**

**If there is a cat living in your household, does it go out?**        

17  
18  
19  
20  
21  
22  
23  
24  
25  
26  
27  
28  
29  
30

At the time when you used raw feeding for your animal the people that were living in the same household included (you can choose more than one)

- Children under 2 years old
- 2-6 year-old children
- Over 6 but under 18 year-old children
- 18-65 year-old adults
- Over 65 year-old adults
- People that have compromised immune system because of some disease (for example HIV/cancer or cytostatic therapy, medication following transplant)

31  
32  
33  
34

Which disease?

35  
36  
37  
38  
39  
40  
41  
42  
43  
44  
45  
46  
47  
48  
49  
50  
51  
52  
53  
54  
55  
56  
57  
58  
59  
60

Which meats/organs/bones do / did you feed raw (you can choose more than one)?

- Beef
- Pork
- Lamb
- Goat
- Broiler / chicken
- Turkey
- Duck
- Reindeer
- Moose
- Deer
- Horse
- Bison
- Egg
- Salmon
- Vendace
- Herring
- Some other fish

- 1  
2  
3  
4  
5  
6  
7
- Birds  
 Rabbit  
 Other (please specify below)

8  
9 Other, what?

10  
11  
12 From which country are the products that you use (if you are not sure, please answer "I don't  
13 know"?

14  
15  
16  
17 Where do you buy the raw animal products?

- 18  
19  
20  
21  
22  
23  
24  
25  
26  
27
- Pet food shop  
 Supermarket  
 Wholesale  
 Internet  
 Straight form the farm / hunter / fisherman  
 I hunt / fish / butcher myself

28 What size are the packages you use?

- 29  
30  
31  
32  
33
- 500g / 1.1 lbs / 17.6 oz or under  
 Over 500g / 1.1 lbs / 17.6 oz, to 1kg / 2.2 lbs / 35.3 oz  
 Over 1kg / 2.2 lbs / 35.3 oz

34 How do you keep the product after taking it out of the freezer?

35  
36  
37

|                            | How many hours max?  | How many days max?   |
|----------------------------|----------------------|----------------------|
| <b>In the refrigerator</b> | <input type="text"/> | <input type="text"/> |
| <b>At room temperature</b> | <input type="text"/> | <input type="text"/> |

38  
39  
40  
41  
42  
43  
44

**Do you refreeze products that have been thawed once?**  Yes  No

45  
46  
47  
48 If you do, how many times?

49  
50  
51  
52 The amount of raw meat/organs/bones in the diet?

- 53  
54  
55  
56  
57  
58  
59  
60
- 90-100 %  
 50-89 %  
 20-49 %  
 Under 20 %

1  
2  
3  
4  
5  
6  
7  
8  
9  
10  
11  
12  
13  
14  
15  
16  
17  
18  
19  
20  
21  
22  
23  
24  
25  
26  
27  
28  
29  
30  
31  
32  
33  
34  
35  
36  
37  
38  
39  
40  
41  
42  
43  
44  
45  
46  
47  
48  
49  
50  
51  
52  
53  
54  
55  
56  
57  
58  
59  
60

What is the rest? Please explain or give name of commercial diet

For how long there has been at least one animal fed raw diet (partly or completely) in your household?

Where do you handle the raw pet food?

- In the same space and with same instruments (knives, spoons, chopping board etc.) as human food.
- In the same space but with different instruments (knives, spoons, chopping board etc.) than human food.
- Always in a different space than human food.

Does the pet (s) also eat

- Other animals' feces
- Soil / grass
- Dead animals from the forest (birds, rats etc.)
- Human foods that are spoiled
- Pig ears
- Drink water from trenches / puddles

Are there / have there been PEOPLE in your household that has become sick from handling the raw pet food or that have become sick from contact with the raw food eating pet?

No Yes

**YES**

Please choose the pathogen (IF IT WAS VERIFIED BY A LABORATORY)

- Echinococcus
- Salmonella
- Campylobacter
- Yersinia
- E. coli
- Clostridium
- Toxoplasma
- I don't remember

1  
2  
3  
4  
5  
6  
7  
8  
9  
10  
11  
12  
13  
14  
15  
16  
17  
18  
19  
20  
21  
22  
23  
24  
25  
26  
27  
28  
29  
30  
31  
32  
33  
34  
35  
36  
37  
38  
39  
40  
41  
42  
43  
44  
45  
46  
47  
48  
49  
50  
51  
52  
53  
54  
55  
56  
57  
58  
59  
60

I don't know  
Other, what?

If you are SURE about the product that caused the contamination, please report what animal it was from, or the raw food product name

If you are PRETTY SURE about the product that caused the contamination, please report what animal it was from or the raw food product name

Who was the person that got sick?

- An adult in the family
- A child in the family
- A senior in the family
- A person outside the family

What was his / her age?

**Did the person who got sick have a disease that led to a compromised immune system over some other disease (for example HIV/cancer or cytostatic therapy, medication following transplant)** Yes No

Which disease?

**Did the family pet(s) have any symptoms at the same time when people got sick?** Yes No

If you answered "yes", please clarify the symptoms.

## End

If you still want to clarify some things, you can do it here

Below you can leave your e-mail address, if you allow us to ask some additional questions if necessary

S2. A decision tree analyses (S2) including all the covariates.

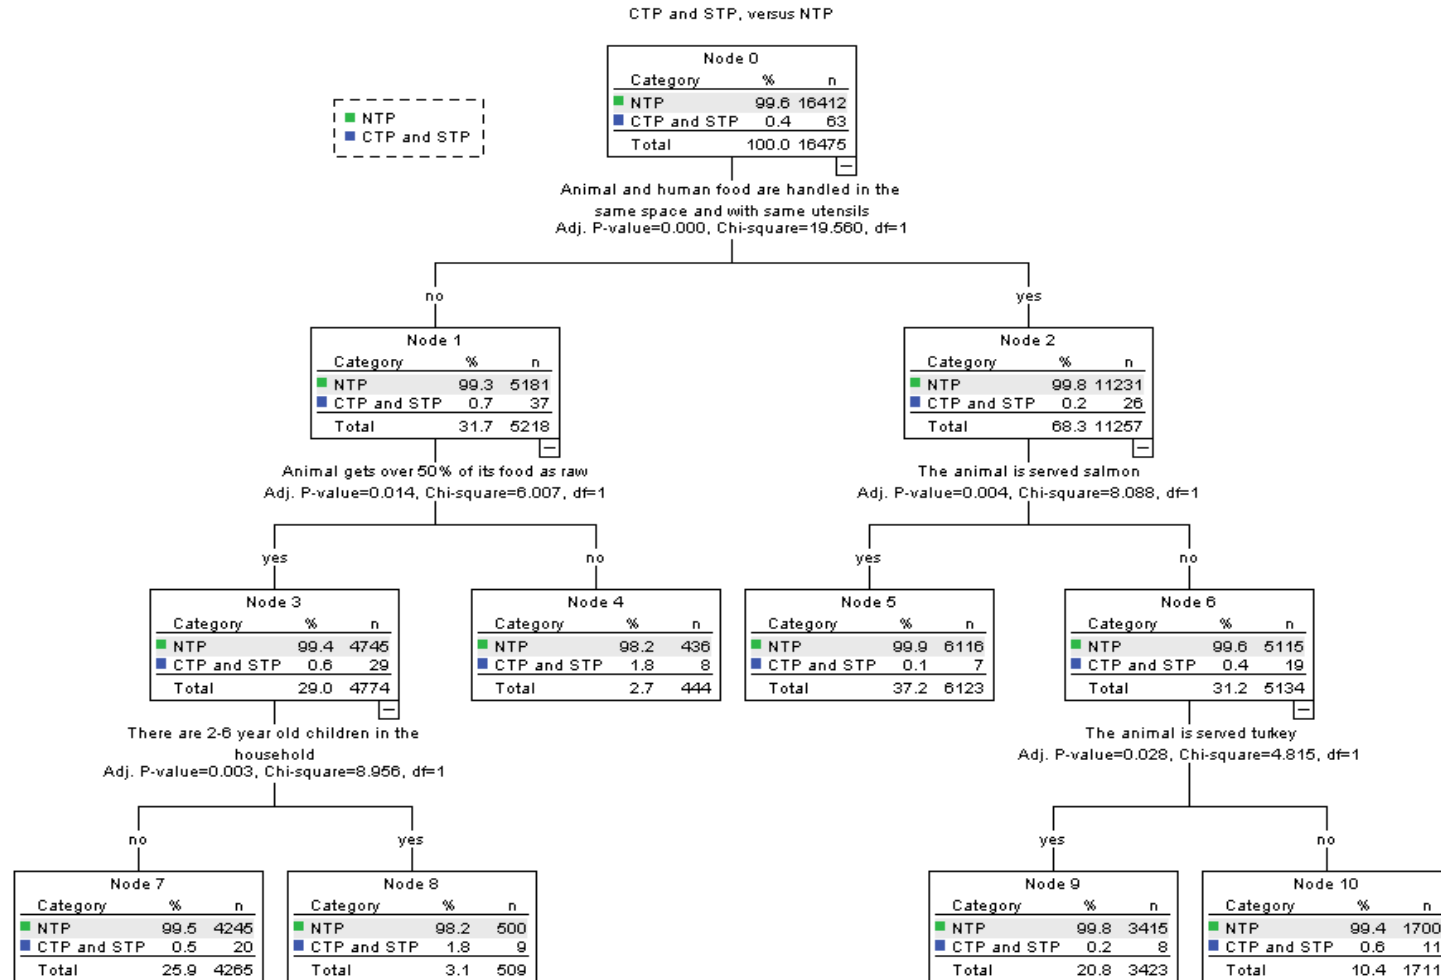

<https://mc.manuscriptcentral.com/vetrec>

**Table S3.** Number of respondents in all countries in a survey to raw feeding dog and cat owners (n=16,475).

| Country                | Total number of respondents | No transmission of pathogen (NTP) | Confirmed transmission of pathogen (CTP) | Suspected transmission of pathogen (STP) | Percentage of CTP households within the country |
|------------------------|-----------------------------|-----------------------------------|------------------------------------------|------------------------------------------|-------------------------------------------------|
| Andorra                | 1                           | 1                                 | 0                                        | 0                                        |                                                 |
| Argentina              | 20                          | 20                                | 0                                        | 0                                        |                                                 |
| Australia              | 801                         | 798                               | 2                                        | 1                                        | 0.2                                             |
| Austria                | 80                          | 80                                | 0                                        | 0                                        |                                                 |
| Bahamas                | 1                           | 1                                 | 0                                        | 0                                        |                                                 |
| Belgium                | 103                         | 103                               | 0                                        | 0                                        |                                                 |
| Belize                 | 2                           | 2                                 | 0                                        | 0                                        |                                                 |
| Bolivia                | 2                           | 2                                 | 0                                        | 0                                        |                                                 |
| Bosnia and Herzegovina | 1                           | 1                                 | 0                                        | 0                                        |                                                 |
| Brazil                 | 95                          | 95                                | 0                                        | 0                                        |                                                 |
| Bulgaria               | 6                           | 6                                 | 0                                        | 0                                        |                                                 |
| Cambodia               | 1                           | 1                                 | 0                                        | 0                                        |                                                 |
| Canada                 | 2586                        | 2574                              | 11                                       | 1                                        | 0.4                                             |
| Chile                  | 32                          | 32                                | 0                                        | 0                                        |                                                 |
| China                  | 13                          | 13                                | 0                                        | 0                                        |                                                 |
| Colombia               | 68                          | 68                                | 0                                        | 0                                        |                                                 |
| Costa Rica             | 7                           | 7                                 | 0                                        | 0                                        |                                                 |
| Croatia                | 12                          | 12                                | 0                                        | 0                                        |                                                 |
| Curacao                | 1                           | 1                                 | 0                                        | 0                                        |                                                 |
| Cyprus                 | 8                           | 8                                 | 0                                        | 0                                        |                                                 |
| Czech Republic         | 13                          | 13                                | 0                                        | 0                                        |                                                 |
| Denmark                | 47                          | 47                                | 0                                        | 0                                        |                                                 |
| Dominican Republic     | 4                           | 4                                 | 0                                        | 0                                        |                                                 |
| Ecuador                | 4                           | 4                                 | 0                                        | 0                                        |                                                 |
| Estonia                | 27                          | 27                                | 0                                        | 0                                        |                                                 |
| Finland                | 1119                        | 1117                              | 2                                        | 0                                        | 0.2                                             |
| France                 | 122                         | 121                               | 1                                        | 0                                        | 0.8                                             |
| Germany                | 317                         | 313                               | 2                                        | 2                                        | 0.6                                             |
| Greece                 | 32                          | 32                                | 0                                        | 0                                        |                                                 |
| Greenland              | 1                           | 1                                 | 0                                        | 0                                        |                                                 |
| Guatemala              | 2                           | 2                                 | 0                                        | 0                                        |                                                 |
| Hungary                | 19                          | 19                                | 0                                        | 0                                        |                                                 |
| Iceland                | 2                           | 2                                 | 0                                        | 0                                        |                                                 |
| India                  | 6                           | 6                                 | 0                                        | 0                                        |                                                 |
| Indonesia              | 8                           | 8                                 | 0                                        | 0                                        |                                                 |
| Ireland                | 185                         | 185                               | 0                                        | 0                                        |                                                 |
| Israel                 | 50                          | 50                                | 0                                        | 0                                        |                                                 |
| Italy                  | 135                         | 135                               | 0                                        | 0                                        |                                                 |
| Japan                  | 3                           | 3                                 | 0                                        | 0                                        |                                                 |

|    |                      |              |              |           |           |            |
|----|----------------------|--------------|--------------|-----------|-----------|------------|
| 1  |                      |              |              |           |           |            |
| 2  |                      |              |              |           |           |            |
| 3  |                      |              |              |           |           |            |
| 4  | Kenya                | 1            | 1            | 0         | 0         |            |
| 5  | Kuwait               | 1            | 1            | 0         | 0         |            |
| 6  | Latvia               | 22           | 22           | 0         | 0         |            |
| 7  | Lebanon              | 2            | 2            | 0         | 0         |            |
| 8  | Lithuania            | 18           | 18           | 0         | 0         |            |
| 9  | Luxembourg           | 3            | 3            | 0         | 0         |            |
| 10 | Macedonia            | 2            | 2            | 0         | 0         |            |
| 11 | Madagascar           | 1            | 1            | 0         | 0         |            |
| 12 | Malaysia             | 22           | 22           | 0         | 0         |            |
| 13 | Malta                | 29           | 27           | 1         | 1         | 3.4        |
| 14 | Mexico               | 89           | 88           | 0         | 1         |            |
| 15 | Mongolia             | 1            | 1            | 0         | 0         |            |
| 16 | Netherlands          | 579          | 579          | 0         | 0         |            |
| 17 | New Zealand          | 185          | 185          | 0         | 0         |            |
| 18 | Norway               | 85           | 82           | 1         | 2         | 1.2        |
| 19 | Panama               | 1            | 1            | 0         | 0         |            |
| 20 | Paraguay             | 1            | 1            | 0         | 0         |            |
| 21 | Peru                 | 21           | 21           | 0         | 0         |            |
| 22 | Philippines          | 12           | 12           | 0         | 0         |            |
| 23 | Poland               | 29           | 29           | 0         | 0         |            |
| 24 | Portugal             | 43           | 43           | 0         | 0         |            |
| 25 | Puerto Rico          | 3            | 3            | 0         | 0         |            |
| 26 | Romania              | 7            | 7            | 0         | 0         |            |
| 27 | Russia               | 1            | 1            | 0         | 0         |            |
| 28 | Singapore            | 30           | 30           | 0         | 0         |            |
| 29 | Slovakia             | 1            | 1            | 0         | 0         |            |
| 30 | Slovenia             | 8            | 8            | 0         | 0         |            |
| 31 | South Africa         | 54           | 54           | 0         | 0         |            |
| 32 | Spain                | 340          | 340          | 0         | 0         |            |
| 33 | Sweden               | 743          | 741          | 2         | 0         | 0.3        |
| 34 | Switzerland          | 55           | 55           | 0         | 0         |            |
| 35 | Taiwan               | 2            | 2            | 0         | 0         |            |
| 36 | Thailand             | 2            | 2            | 0         | 0         |            |
| 37 | Tunisia              | 2            | 2            | 0         | 0         |            |
| 38 | Turkey               | 13           | 13           | 0         | 0         |            |
| 39 | UK                   | 3151         | 3133         | 9         | 9         | 0.3        |
| 40 | Ukraine              | 7            | 7            | 0         | 0         |            |
| 41 | United Arab Emirates | 9            | 9            | 0         | 0         |            |
| 42 | Uruguay              | 4            | 4            | 0         | 0         |            |
| 43 | USA                  | 4950         | 4935         | 8         | 7         | 0.2        |
| 44 | Venezuela            | 2            | 2            | 0         | 0         |            |
| 45 | Vietnam              | 1            | 1            | 0         | 0         |            |
| 46 | Left empty           | 6            | 6            | 0         | 0         |            |
| 47 | <b>Total</b>         | <b>16475</b> | <b>16412</b> | <b>39</b> | <b>24</b> | <b>0.2</b> |

CTP=confirmed transmission of pathogen, STP=suspected transmission of pathogen, NTP=no transmission of pathogen.
